# Supplementary material
Source: PubMed Central journal article supplement (PMC5007610)

## Supplementary information

### Functional disruption of the dystrophin gene in Rhesus Monkey Using CRISPR/Cas9

Yongchang Chen<sup>1,3,5#</sup>, Yinghui Zheng<sup>2#</sup>, Yu Kang<sup>1,3,5#</sup>, Weili Yang<sup>2#</sup>, Yuyu Niu<sup>1,3,5</sup>,  
Xiangyu Guo<sup>2</sup>, Zhuchi Tu<sup>2</sup>, Chenyang Si<sup>1,5</sup>, Hong Wang<sup>1,5</sup>, Ruxiao Xing<sup>2</sup>, Xiuqiong Pu<sup>1,5</sup>,  
Shang-Hsun Yang<sup>6</sup>, Shihua Li<sup>4</sup>, Weizhi Ji<sup>1,3,5\*</sup>, Xiao-Jiang Li<sup>2, 4\*</sup>

<sup>1</sup>Yunnan Key Laboratory of Primate Biomedical Research, Kunming, 650500, China

<sup>2</sup>State Key Laboratory of Molecular Developmental Biology, Institute of Genetics and Developmental Biology, Chinese Academy of Sciences, Beijing, 10010, China

<sup>3</sup>Life Science and Technology, Kunming University of Science and Technology, Kunming, 650224, China

<sup>4</sup>Department of Human Genetics, Emory University School of Medicine, Atlanta, Georgia, 30322, USA

<sup>5</sup>Kunming Biomed International and National Engineering Research Center of Biomedicine and Animal Science, Kunming, 650500, China

<sup>6</sup>Department of Physiology, College of Medicine, National Cheng Kung University, Tainan 70101, Taiwan

#These authors contributed equally to this work.

## Supplementary Figure legends

### Figure Legends

**Figure S1. Off-target analysis via T7EN1 assay.** DNA gel data showing no cleavage by T7EN1 for the potential targeted DNAs. WT is a negative control, PC is a positive control.

**Figure S2. Histological analysis of monkey muscles. (A)** Anti-dystrophin immunostaining (left) and H&E staining (right) of 8-year-old monkey muscle sections. Scale bars: 50 (left) and 20 (right)  $\mu\text{m}$ . **(B)** H&E staining of skeletal muscles of full-term stillborn WT and Mut-2 monkeys. Scale bars: 20  $\mu\text{m}$ .

**Supplementary Table 1. Potential off-target sequences and their genes.**

Supplementary Table-1

| Potential off-target | Genbank Sequence ID  | Sequences (potential targeted region bold, mismatch: red)  | Primer Sequences (5' to 3')                          | Amplification (bp) |
|----------------------|----------------------|------------------------------------------------------------|------------------------------------------------------|--------------------|
| 1                    | NW_001098157.1 chr12 | <b>tatggTg</b> ATAAACTGACTCTTGG                            | TCATTTCCAGGCACACTTGA<br>TTGACTCAGTGAGGGGACCT         | 538bp              |
| 2                    | NW_001122901.1 chr8  | <b>aaagcag</b> ATAAACTGACTCTTGG                            | ACCAGAAGGCAGGTGAGAGA<br>ATACCGAGAGCAAGGTGGTG         | 577bp              |
| 3                    | NW_001108738.1 chr1  | <b>Ga</b> AAACAT <b>ac</b> AACTGACTCTTGG                   | TGCCAGGAAACAGGGTAAAG<br>TGTTTGCCTGCAGTCATTTCC        | 511bp              |
| 4                    | NW_001096616.1 chr11 | <b>aaaATCATa</b> AAATGACTCTTGG                             | GCCCAGAGTGTAATCTGCTCA<br>TCAAATTAAGTTAACAAAAAGGAAGG  | 502bp              |
| 5                    | JV543636.1 chr12     | <b>GGAt</b> ATCATAAA <b>agGACa</b> CTTGG                   | A<br>TCTGTTGTTGGGTTCTACAAATG<br>CTGCAGCCTGACTGACAGAG | 538bp              |
| 6                    | JV638520 chr1        | <b>GGAAATCATct</b> ACTG <b>c</b> CTCTTGG                   | TCCCTTCCTGCCTTAAATCC<br>TCCCAACAGGCAAGAAAATC         | 552bp              |
| 7                    | NM_001261353.1 chrX  | <b>tGAAATCAaAAg</b> CTG <b>at</b> TCTTGG                   | GCCAAAGAGAAATCAAAACAGAA<br>TCCTAGGAATTTTTCCATTTCA    | 509bp              |
| 8                    | JU481420.1 chrX      | <b>GGAAATgAg</b> AAACTGACT <b>Ca</b> TGG                   | ATGGCCAATGTTGTGTGAGA<br>TAGCCAGCTCCTCACCAGTT         | 525bp              |
| 9                    | NW_001114282.1 chr3  | <b>tGAAATCAaAAg</b> CTG <b>at</b> TCTTGG                   | TCCTTTTTTCTCATTCTGCAA<br>CAGATTACACTCTGGGCCATT       | 552bp              |
| 10                   | NW_001124211.1 chr9  | <b>GGAAf</b> TCAT <b>tg</b> cCTGACTCTTGG                   | GGGCTACCCAATCTGACAAA<br>GGGCTACAATCTGGCTTCAG         | 534bp              |
| 11                   | NW_001122901.1 chr8  | <b>GGt</b> AAT <b>g</b> ATAAA <b>a</b> TGACT <b>f</b> TTGG | CCTGACCTGACAAAGCCATT<br>GCAGTGTCCAGGGTTACCAC         | 565bp              |
| 12                   | NW_001101665.1 chr15 | <b>GcAAc</b> TC <b>ac</b> AAACTG <b>ac</b> aCTTGG          | CCACCTCCCACATAAACCAC<br>TGAGGCCTTCATGCCTAGAT         | 596bp              |
| 13                   | NW_001118155.1 chr5  | <b>Ga</b> AAA <b>f</b> TCATAAACT <b>Ga</b> CT <b>c</b> TGG | AAGCCACGCTTTTTCAACTC<br>TGATCAGAGGAATGGATGGAG        | 590bp              |

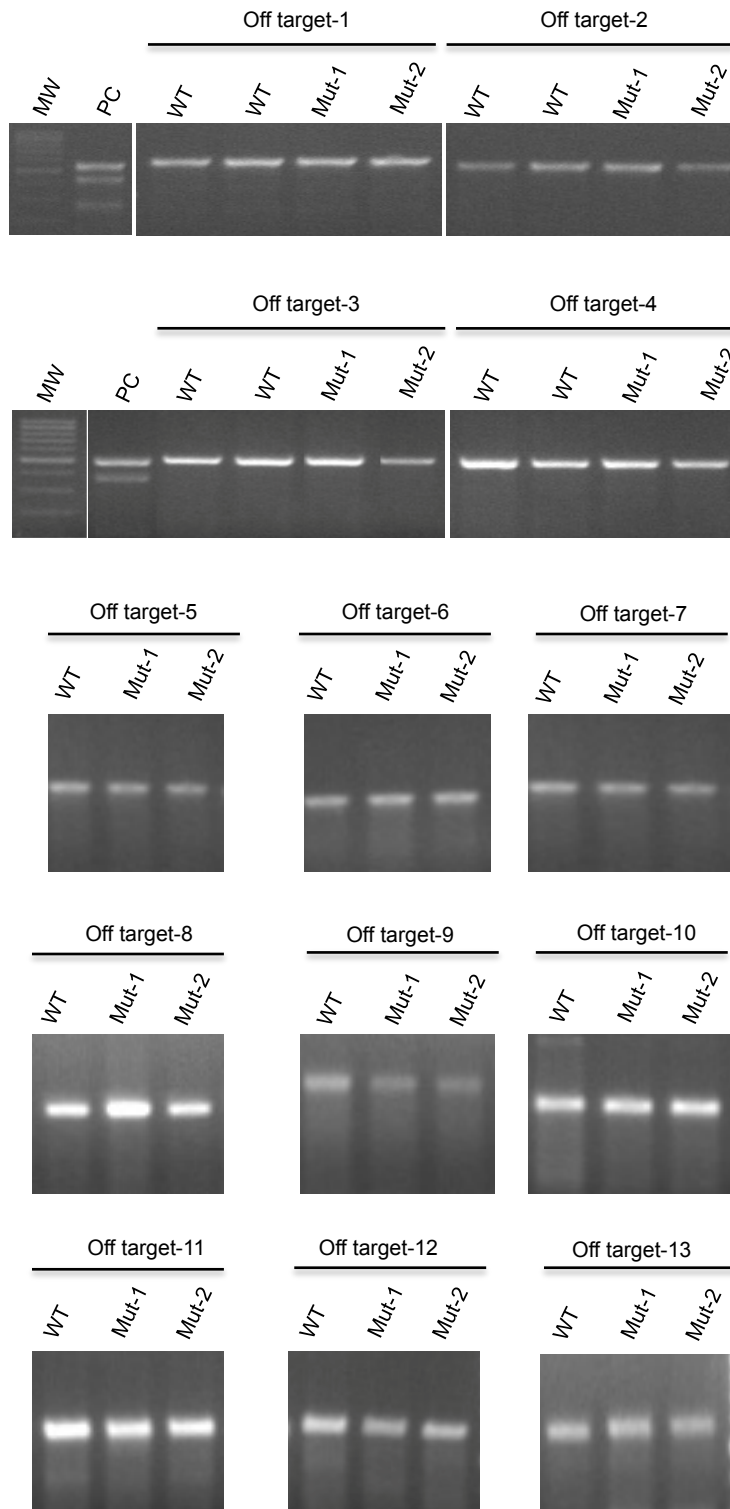

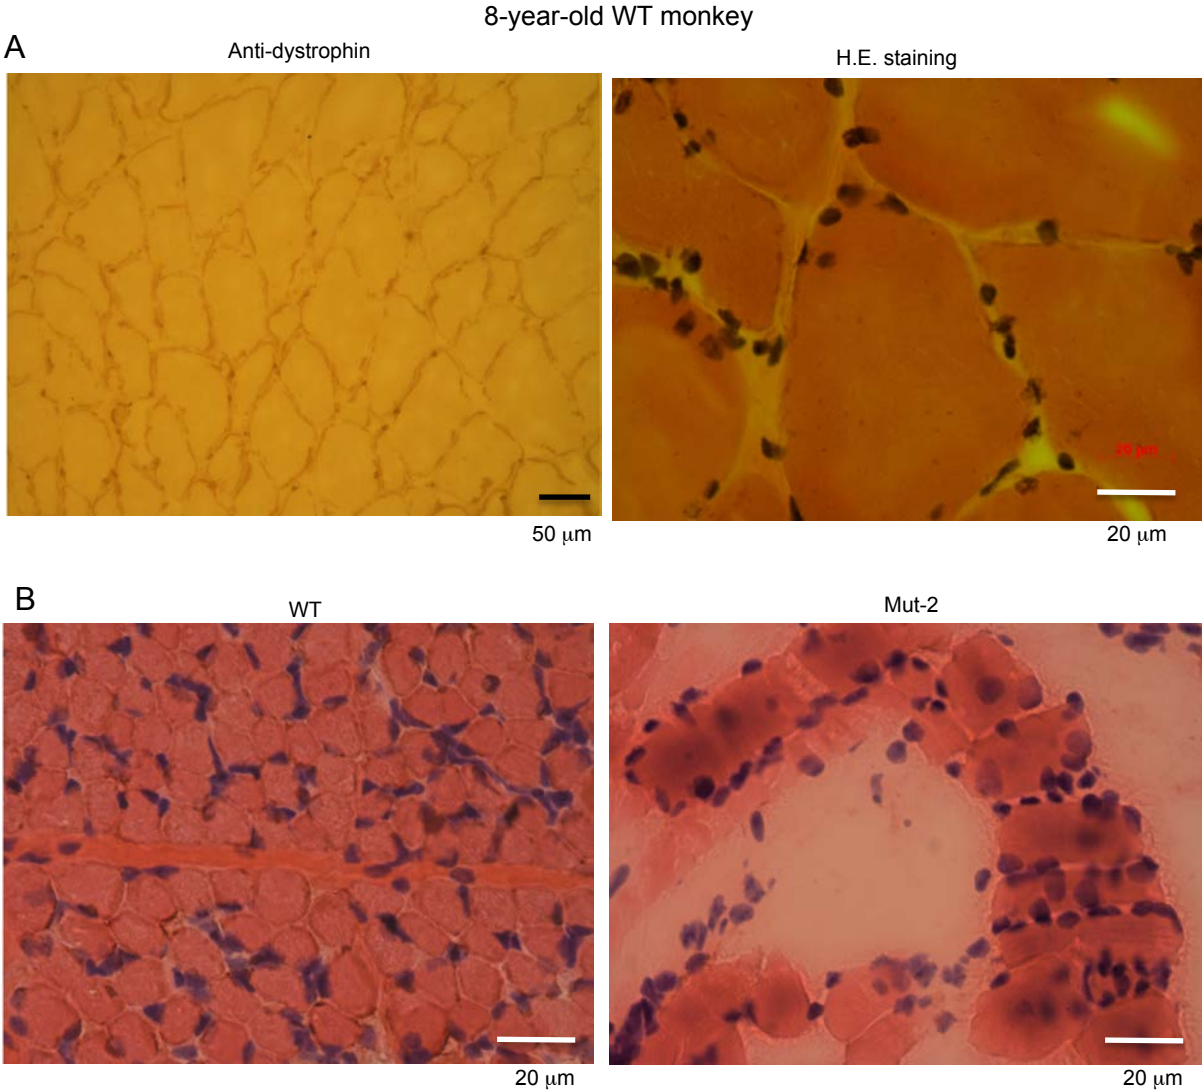

Supplement: supp_ddv120_ddv120supp.pdf [file supp_ddv120_ddv120supp.pdf]
